**Depressive, anxiety and stress symptoms among university students from Bogotá, Colombia and electronic nicotine delivery systems (ENDS) use: Findings from a prevalence survey 2021**

**Short title:** Mental health symptoms among university students and ENDS use.

**María Camila García Durán**<sup>1¶</sup>, **María Catalina Botero Ruge**<sup>1¶</sup>, **Gustavo Perdomo Patiño**<sup>2&</sup>, **Adriana Pulido Álvarez**<sup>1&</sup>,  
**Manuela Lüchau**,<sup>1&</sup> **Elizabeth Borrero**<sup>1&</sup>, **Sergio Moreno**<sup>1,3&</sup>

1 Population Health, Fundación Santa Fe de Bogotá, Bogotá, Colombia

2 Mental Health Department, Fundación Santa Fe de Bogotá, Bogotá, Colombia

3 School of Medicine, Universidad de los Andes, Bogotá, Colombia

\* Corresponding author

Email: [maria.botero@fsfb.org.co](mailto:maria.botero@fsfb.org.co) (MCB)

¶ These authors contributed equally to this work, and are both main authors

& These authors also contributed equally to this work

## 1 **Abstract**

2 The use of electronic nicotine delivery systems (ENDS) has increased in recent years, particularly among young people. The  
3 association between mental health disorders and conventional cigarettes is well established. However, information on ENDS  
4 use and mental health is still emerging. This study i) determines the frequency of depression, anxiety and stress symptoms  
5 among university students in Bogotá, Colombia, ii) examines the association between sociodemographic variables and mental  
6 health symptoms, and iii) analyses whether there is an association between tobacco and/or ENDS use and depression, anxiety  
7 and/or stress. The study is cross-sectional, analytical, retrospective and based on a multistage random sample. 3850 students  
8 from 21 universities completed an online survey and were included as participants. We assessed demographic variables,  
9 tobacco use, ENDS use and symptoms of depression, anxiety and stress. 667 participants from our sample had a previous  
10 diagnosis of a mental disorder, and the most common diagnoses were any type of anxiety disorder (7.27%) or depressive  
11 disorder (6.70%). Ever use of conventional cigarettes was 63.71% and ever use of ENDS was 31%. More than 65% of the  
12 participants had mild symptoms of depression, anxiety and stress. However, between 16.4% and 19.5% of participants  
13 reported severe or very severe symptoms of these three diagnoses. Severe or very severe symptoms were more likely to be  
14 reported by women, public university students and those from higher socio-economic backgrounds. Those who reported  
15 having tried conventional cigarettes or ENDS had more severe or extremely severe symptoms than those who had never tried  
16 them. Multivariate analysis using ordinal logistic regression showed that depression, anxiety and stress levels were more  
17 severe in participants who had tried ENDS. In addition, having nuclear family members, family members or close friends with  
18 a history of nicotine use was positively associated with higher levels of depression, anxiety and stress.

19  
20  
21  
22

## 23 Introduction

24 Electronic nicotine delivery systems (ENDS), also known as electronic cigarettes (e-cigarettes) or vapers, are battery-powered  
25 devices used to inhale, smoke or 'vape' an aerosol that usually contains flavourings and nicotine, as well as a range of other  
26 chemicals such as propylene glycol, glycerol and vegetable glycerine, and a range of metals that can be highly toxic, such as  
27 lead, chromium and nickel [1]. These devices began to be marketed in the United States around 2010, and their use has  
28 increased rapidly in recent years [2].

29 According to the American Academy of Paediatrics (2019), the rate of people in the United States who have tried electronic  
30 nicotine delivery systems (ENDS) at least once in their lifetime doubled between 2013 and 2016. In 2016, the overall  
31 prevalence of ever-users of electronic nicotine delivery systems (ENDS) was about 16.4%, and the prevalence of current users  
32 was 5.6%. Among non-tobacco smokers, the prevalence of ever-users of ENDS was 7.0% and the prevalence of current users  
33 was 1.5%. The prevalence of use of these devices among the tobacco smoking population showed that 54.7% had ever used  
34 ENDS, while 19.4% were current users of both tobacco and ENDS [3].

35 The increase in the use of ENDS may be related to the fact that these devices are perceived as less harmful than regular  
36 cigarettes [4], as a mechanism for socialising with peers due to the social rituals built around them [5], or as a smoking  
37 cessation tool. However, ENDS are controversial because of their long-term health effects [6], [7], [8] and their impact on  
38 smoking cessation is unclear in the literature [9], [10], [11], [12]. In particular, among adolescents and young adults, there is  
39 evidence of an association between e-cigarette use and increased risk of cigarette smoking initiation [13], [14], as well as  
40 increased average and frequency of cigarette consumption [15].

41 The link between mental health and the use of conventional cigarettes is well established. Tobacco smoking is associated  
42 with an increased risk of developing depression or anxiety [16], [17]. Adults with mental health problems have  
43 disproportionately high rates of cigarette smoking [18], [19], [20] and have a lower life expectancy than the general  
44 population as a result of this habit [21]. However, information on e-cigarette use and mental health is still emerging.

45

46 A nationally representative study of adults in the United States found that ENDS-only, cigarette-only or dual users were more  
47 likely to report ever and in the past 12 months internalising and externalising problems than those who did not report using  
48 tobacco products [22]. Similarly, other studies suggest that people with mental health problems are more likely to have tried  
49 and/or used e-cigarettes than those without mental health problems or psychological distress [23], [24], [25], [26]. The  
50 findings are similar among young adults. Studies suggest that students with a history of mental health problems are more  
51 likely to use cigarettes [27], [28], [29], and that vaping is associated with conventional smoking, cannabis use and/or alcohol  
52 use [30], [31], [32].

53 The relationship between depressive symptoms and ENDS use has been studied more extensively. Some cross-sectional  
54 studies in young populations suggest that ENDS use is associated with increased odds of reporting depressive symptoms and  
55 suicidal ideation [33], [34]. One longitudinal study found a bidirectional association between depressive symptoms and e-  
56 cigarette use [35]. Greater depressive symptoms at age 14 years were associated with a faster rate of e-cigarette escalation  
57 [36]. Findings in adults are similar. People who use e-cigarettes are more likely to report depression [37], and conversely,  
58 depressive symptoms have shown positive associations with ENDS use and nicotine concentration in both cross-sectional and  
59 longitudinal analyses [38], [39].

60 Similar associations have been found between anxiety and/or stress and ENDS use. Social anxiety has been indirectly  
61 associated with e-cigarette initiation [40], and higher anxiety symptoms have been associated with current cigarette and e-  
62 cigarette use among college students [41]. A study of a nationally representative sample of US adults reported that e-cigarette  
63 use was associated with increased levels of psychological distress [25], [42] and also reported that perceived stress was higher  
64 among ENDS users compared with non-users. Perceived stress has been associated with a higher risk of transition to current  
65 e-cigarette use among ever-users and continued use among current users [42], [43].

66 Colombia has the second highest use of these devices in the Andean region (16.1%), ahead of Ecuador (27.4%) and followed  
67 by Bolivia and Peru (12.8% and 12.5% respectively) [44]. ENDS are the third most used legal substance in this country, after  
68 alcohol and conventional cigarettes [45]. The prevalence of ever use of ENDS is 15.4% among high school students [46] and  
69 16.1 % among university students, with higher prevalence rates among males than females [44]. The population aged 18-24  
70 years has the highest rates of ever and monthly use [45]. This age group corresponds to the age of most university students.

71 Prevalence rates of depression and anxiety among university students are higher than 30% in some regions of the country,  
72 such as Bucaramanga, Medellin and the Atlantic coast, where studies have suggested there can be an unexplored and  
73 increased risk in this population [47], [48], [49], [50].  
74 Information on the association between ENDS consumption and mental health among university students is not available for  
75 the Colombian population. The present study aimed to a) determine the frequency of symptoms related to depression,  
76 anxiety and stress among university students in Bogotá, b) examine the association between socio-demographic variables  
77 and these mental health conditions in our population, and c) determine if there is an association between tobacco and/or e-  
78 cigarette use and depression, anxiety and/or stress. The results obtained may identify at-risk groups, inform student health  
79 sectors, and contribute to public policies and services for university students.

80

## 81 **Materials and Methods**

### 82 Participants and data collection

83 This study is part of a project entitled: "Prevalence and psychosocial factors associated with ENDS consumption in university  
84 populations of Bogota" [51]. The design of the study was cross-sectional, analytical and based on a multistage random sample.  
85 The sample size (3985) was calculated using an estimated margin of error of 5%, an estimated prevalence of ENDS use of  
86 16.6%, an interclass correlation coefficient of 4% and a significance level of 5%. The first sampling stage consisted of the  
87 Higher Education Institutions (HEIs) registered in Bogotá, Colombia, selected proportionally to their size based on the number  
88 of students. The second stage consisted of the random selection of programmes in each of the selected HEIs. Substitutions  
89 were made in the event of no acceptance or no response from an HEI.  
90 Students were invited to participate in an online survey hosted in the cloud research software REDCap<sup>®</sup>[52], consisting of 64  
91 questions related to socio-demographic data, tobacco use, ENDS use, tobacco and/or ENDS use during the pandemic, and  
92 mental health (depression, anxiety and stress). Participants were eligible if they were 18 years or older and enrolled in one

93 of the selected programmes and universities in Bogotá. Informed consent, approved by the Ethics Committee of the Santa Fe  
94 Foundation of Bogotá (approval code CCEI-10765-2019), was provided before the questions were administered, in  
95 accordance with the Declaration of Helsinki and all relevant guidelines and ethical regulations. The survey took approximately  
96 10-15 minutes to complete. No financial incentives were offered. Data were collected from March 2021 to November 2021.  
97 3850 students completed the survey and were included in the study.

98

## 99 Measures

100 **Demographics:** We used the following demographic information as control variables in the model: gender (male/female),  
101 age, socioeconomic level (low/middle/high), type of university (private/public), number of children, and whether they had  
102 worked and studied in the last 6 months. It is important to clarify that in Colombia there are seven socioeconomic levels (from  
103 0 to 6), which we recoded into low (0-2), middle (3-4) and high (5-6) according to what is used in the country.

104 **Other variables of interest** included in the analyses (and their possible responses) were a) people living with the participant  
105 (both parents / mother or father / other family member / alone / friends / couple / acquaintances / other), b) if they exercised  
106 (yes / no), c) if they had ever had a mental health diagnosis (any type of bipolar disorder / depressive disorder / post-traumatic  
107 stress disorder / anxiety disorder / schizophrenia or any psychotic disorder / personality disorder / substance or alcohol abuse  
108 / eating disorder / none / other disorder not mentioned in the list); (d) whether anyone close to them used nicotine (members  
109 of the nuclear family (mother, father, siblings) / family members / couple / close friends / people they live with (housemates)  
110 / other close person).

111 **Tobacco use:** Was assessed by the question "Have you ever tried smoking a cigarette in your life, even just once?" (yes/no).

112 **ENDS use:** Was measured by the question "Have you ever used an ENDS (such as electronic cigarettes or vapers)?" (yes/no).

113 **DASS-21:** The Depression, Anxiety, and Stress Scale (DASS-21) is a 21-item scale used to screen for depression, anxiety, and  
114 stress. This scale has been validated in Colombia and shows good internal consistency (0.92-0.93)[53]. Each subscale is

115 assessed through 7 items. Participants are asked to score the questions from 0 (did not apply to me at all) to 3 (applied to me  
116 very much or most of the time); thus, every subscale has a maximum score of 21. Higher scores represented greater levels of  
117 the condition. The cut-off points used to determine the severity of depression were 5-6 (mild), 7-10 (moderate), 11-13  
118 (severe), and 14 or more (extremely severe); to determine the severity of anxiety were 4 (mild), 5-7 (moderate), 8-9 (severe)  
119 and 10 or more (extremely severe); and to determine the severity of stress were 8-9 (mild), 10-12 (moderate), 13-16 (severe)  
120 and 17 or more (extremely severe).

## 121 Statistical analysis

122 Descriptive analysis was performed using measures of central tendency and dispersion for the quantitative variables and  
123 absolute and relative frequencies for the qualitative variables, stratified by level of depression according to the DASS-21 scale.  
124 The possible factors associated with the different levels of depression, anxiety and stress were assessed using an ordinal  
125 logistic regression model. The candidate variables for the model were based on the literature review and their possible  
126 contextual plausibility. Multivariate models were estimated, considering first-order interactions to assess potential  
127 confounders, and a reduced model was constructed based on the Furnival-Wilson algorithm, reporting the logarithm of  
128 likelihood, Akaike's information criterion, and Bayesian information criterion. Adjusted odds ratios (aOR) were reported as  
129 measures of association with their corresponding confidence intervals. The goodness of fit of the model and its underlying  
130 assumptions were assessed using a linearity test, the parallelism or proportional odds test, collinearity using the VIF and  
131 analysis of deviance residuals. The a priori significance level was set at 5%. The statistical analysis was performed in  
132 Stata16MP.

## 133 **Results**

134 A total of 3850 participants were included in this study. The demographic characteristics of the population and some other  
135 variables of interest are described in Table 1. Most of our sample (61%) were women, of the total sample 3527 (92%) were

136 between 18 and 26 years old and 93% were studying in a private university. More than half of the participants belonged to a  
 137 middle socio-economic level (53%), followed by a low socio-economic level (37.16%). Of the total sample, over 70% of the  
 138 participants worked and studied at the same time in the last 6 months, and almost the same percentage reported not having  
 139 any children. Most participants reported living with their parents and/or in a couple and more than half of the students  
 140 reported doing some kind of physical activity (54.1%). Finally, participants reported that their family members (31.9%), close  
 141 friends (30.13%) and members of their nuclear family (28.16%) used nicotine.

142 **Table 1. Demographic characteristics of the study population**

143

| Variable                                  |                      | N (%)                |
|-------------------------------------------|----------------------|----------------------|
|                                           |                      | N= 3850              |
| <b>Sociodemographic</b>                   |                      |                      |
| <b>Sex</b>                                | <b>Male</b>          | <b>1513 (39%)</b>    |
|                                           | <b>Female</b>        | <b>2337 (61%)</b>    |
| <b>Age group</b>                          | <b>Between 18-26</b> | <b>3527 (91.61%)</b> |
|                                           | <b>Between 27-60</b> | <b>322 (8.36%)</b>   |
|                                           | <b>Missing data</b>  | <b>1 (0.03%)</b>     |
| <b>Socioeconomic Level</b>                | <b>Low (0-1-2)</b>   | <b>1431 (37.16%)</b> |
|                                           | <b>Medium (3-4)</b>  | <b>2041 (53.01%)</b> |
|                                           | <b>High (5-6)</b>    | <b>334 (8.68%)</b>   |
|                                           | <b>Missing data</b>  | <b>44 (1.14%)</b>    |
| <b>Type of university</b>                 | <b>Public</b>        | <b>276 (7.17%)</b>   |
|                                           | <b>Private</b>       | <b>3574 (92.83%)</b> |
| <b>Worked and studied during the past</b> | <b>No</b>            | <b>1132 (29.40%)</b> |



| Variable                             |                                 | N (%)         |
|--------------------------------------|---------------------------------|---------------|
|                                      |                                 | N= 3850       |
| 6 months                             | Yes                             | 2710 (70.39%) |
|                                      | Missing data                    | 8 (0.21%)     |
| Number of children                   | None                            | 2684 (70.32%) |
|                                      | 1 child                         | 606 (15.88%)  |
|                                      | 2 children                      | 395 (10.35%)  |
|                                      | 3 or more children              | 132 (3.46%)   |
| <b>Other variables of interest</b>   |                                 |               |
| People who live with the participant | Both parents                    | 1203 (31.25%) |
|                                      | Mother or father                | 952 (24.73%)  |
|                                      | Another family member           | 728 (18.91%)  |
|                                      | Alone                           | 267 (6.94%)   |
|                                      | Friends                         | 67 (1.74%)    |
|                                      | Couple                          | 1028 (26.70%) |
|                                      | Acquaintances                   | 23 (0.60%)    |
|                                      | Other                           | 267 (6.94%)   |
| Exercise (physical activity)         | No                              | 1759 (45.69%) |
|                                      | Yes                             | 2083 (54.10%) |
|                                      | Missing data                    | 8 (0.21%)     |
| Previous mental health diagnosis     | Any type of depressive disorder | 258 (6.70%)   |
|                                      | Any type of bipolar disorder    | 14 (0.36%)    |
|                                      | Postrumatic stress disorder     | 24 (0.62%)    |

| <b>Variable</b>                          |                                                        | <b>N (%)</b>         |
|------------------------------------------|--------------------------------------------------------|----------------------|
|                                          |                                                        | <b>N= 3850</b>       |
|                                          | <b>Any type of anxiety disorder</b>                    | <b>280 (7.27%)</b>   |
|                                          | <b>Schizophrenia or any type of psychotic disorder</b> | <b>6 (0.16%)</b>     |
|                                          | <b>Personality disorder</b>                            | <b>16 (0.42%)</b>    |
|                                          | <b>Abuse or dependence of psychoactive substances</b>  | <b>14 (0.36%)</b>    |
|                                          | <b>Eating disorder</b>                                 | <b>55 (1.43%)</b>    |
| <b>Close people who consume nicotine</b> | <b>Members of the nuclear family</b>                   | <b>1084 (28.16%)</b> |
|                                          | <b>Other family members</b>                            | <b>1228 (31.90%)</b> |
|                                          | <b>Couple</b>                                          | <b>307 (7.97%)</b>   |
|                                          | <b>Close friends</b>                                   | <b>1160 (30.13%)</b> |
|                                          | <b>Housemates</b>                                      | <b>82 (2.13%)</b>    |
|                                          | <b>Other close person</b>                              | <b>489 (12.70%)</b>  |
| <b>ENDS and tobacco use</b>              |                                                        |                      |
| <b>Have tried conventional cigarette</b> | <b>Yes</b>                                             | <b>2453 (63.71%)</b> |
|                                          | <b>No</b>                                              | <b>1389 (36.08%)</b> |
|                                          | <b>Missing data</b>                                    | <b>8 (0.21%)</b>     |
| <b>Have tried ENDS</b>                   | <b>Yes</b>                                             | <b>1187 (30.83%)</b> |
|                                          | <b>No</b>                                              | <b>2630 (68.31%)</b> |
|                                          | <b>Missing data</b>                                    | <b>33 (0.86%)</b>    |



146 667 participants had a previous diagnosis of any mental disorder, the most common being any type of anxiety disorder  
147 (7.27%) and any type of depressive disorder (6.70%). Most participants have tried conventional cigarettes (63.71%). On the  
148 contrary, only 31% of them have ever used ENDS.

149 Table 2 shows the levels of depressive, anxiety and stress symptoms in the study population by sex, type of university and  
150 socioeconomic level, as well as by ever using conventional cigarettes or ENDS.

151 **Table 2. Levels of depression, anxiety and stress symptoms stratified by sociodemographic variables and tobacco/ENDS**  
152 **use.**

|                                            |         | Depression   |             |             |                  | Anxiety      |             |            |                  | Stress       |             |             |                  |
|--------------------------------------------|---------|--------------|-------------|-------------|------------------|--------------|-------------|------------|------------------|--------------|-------------|-------------|------------------|
|                                            |         | Mild         | Moderate    | Severe      | Extremely severe | Mild         | Moderate    | Severe     | Extremely severe | Mild         | Moderate    | Severe      | Extremely severe |
| <b>General</b>                             |         | 2656 (69.0%) | 510 (13.2%) | 278 (7.2%)  | 406 (10.5%)      | 2504 (65.0%) | 595 (15.5%) | 234 (6.1%) | 517 (13.4%)      | 2782 (72.3%) | 437 (11.4%) | 425 (11.0%) | 206 (5.4%)       |
| <b>Sex</b>                                 | Male    | 1102 (72.8%) | 169 (11.2%) | 112 (7.4%)  | 130 (8.6%)       | 1080 (71.4%) | 201 (13.3%) | 77 (5.1%)  | 155 (10.2%)      | 1170 (77.3%) | 155 (10.2%) | 127 (8.4%)  | 61 (4.0%)        |
|                                            | Female  | 1554 (66.5%) | 341 (14.6%) | 166 (7.1%)  | 276 (11.8%)      | 1424 (60.9%) | 394 (16.9%) | 157 (6.7%) | 362 (15.5%)      | 1612 (69.0%) | 282 (12.1%) | 298 (12.8%) | 145 (6.2%)       |
| <b>Type of university</b>                  | Public  | 153 (55.4%)  | 37 (13.4%)  | 28 (10.1%)  | 58 (21.0%)       | 159 (57.6%)  | 45 (16.3%)  | 11 (4.0%)  | 61 (22.1%)       | 175 (63.4%)  | 32 (11.6%)  | 40 (14.5%)  | 29 (10.5%)       |
|                                            | Private | 2503 (70.0%) | 473 (13.2%) | 250 (7.0%)  | 348 (9.7%)       | 2345 (65.6%) | 550 (15.4%) | 223 (6.2%) | 456 (12.8%)      | 2607 (72.9%) | 405 (11.3%) | 385 (10.8%) | 177 (5.0%)       |
| <b>Socioeconomic level</b>                 | Low     | 1036 (72.4%) | 175 (12.2%) | 93 (6.5%)   | 127 (8.9%)       | 982 (68.6%)  | 183 (12.8%) | 82 (5.7%)  | 184 (12.9%)      | 1087 (76.0%) | 132 (9.2%)  | 150 (10.5%) | 62 (4.3%)        |
|                                            | Middle  | 1398 (68.5%) | 274 (13.4%) | 139 (6.8%)  | 230 (11.3%)      | 1309 (64.1%) | 339 (16.6%) | 129 (6.3%) | 264 (12.9%)      | 1460 (71.5%) | 243 (11.9%) | 217 (10.6%) | 121 (5.9%)       |
|                                            | High    | 197 (59.0%)  | 53 (15.9%)  | 42 (12.6%)  | 42 (12.6%)       | 186 (55.7%)  | 64 (19.2%)  | 23 (6.9%)  | 61 (18.3%)       | 201 (60.2%)  | 60 (18.0%)  | 55 (16.5%)  | 18 (5.4%)        |
|                                            | Missing | 25 (56.8%)   | 8 (18.2%)   | 4 (9.1%)    | 7 (15.9%)        | 27 (61.4%)   | 9 (20.5%)   | 0 (0.0%)   | 8 (18.2%)        | 34 (77.3%)   | 2 (4.5%)    | 3 (6.8%)    | 5 (11.4%)        |
| <b>Having tried conventional cigarette</b> | Yes     | 1653 (67.4%) | 326 (13.3%) | 195 (7.9%)  | 279 (11.4%)      | 1567 (63.9%) | 389 (15.9%) | 145 (5.9%) | 352 (14.3%)      | 1732 (70.6%) | 292 (11.9%) | 290 (11.8%) | 139 (5.7%)       |
|                                            | No      | 995 (71.6%)  | 184 (13.2%) | 83 (6.0%)   | 127 (9.1%)       | 929 (66.9%)  | 206 (14.8%) | 89 (6.4%)  | 165 (11.9%)      | 1042 (75.0%) | 145 (10.4%) | 135 (9.7%)  | 67 (4.8%)        |
|                                            | Missing | 8 (100%)     | 0 (0.0%)    | 0 (0.0%)    | 0 (0.0%)         | 8 (100%)     | 0 (0.0%)    | 0 (0.0%)   | 0 (0.0%)         | 8 (100%)     | 0 (0.0%)    | 0 (0.0%)    | 0 (0.0%)         |
| <b>Having tried ENDS</b>                   | Yes     | 690 (58.1%)  | 191 (16.1%) | 122 (10.3%) | 184 (15.5%)      | 670 (56.4%)  | 226 (19.0%) | 75 (6.3%)  | 216 (18.2%)      | 752 (63.4%)  | 162 (13.6%) | 178 (15.0%) | 95 (8.0%)        |
|                                            | No      | 1939 (73.7%) | 316 (12.0%) | 153 (5.8%)  | 222 (8.4%)       | 1809 (68.8%) | 364 (13.8%) | 159 (6.0%) | 298 (11.3%)      | 2003 (76.2%) | 273 (10.4%) | 243 (9.2%)  | 111 (4.2%)       |
|                                            | Missing | 27 (81.8%)   | 3 (9.1%)    | 3 (9.1%)    | 0 (0.0%)         | 25 (75.8%)   | 5 (15.2%)   | 0 (0.0%)   | 3 (9.1%)         | 27 (81.8%)   | 2 (6.1%)    | 4 (12.1%)   | 0 (0.0%)         |

154 Over 65% of participants were classified as having mild symptoms. For depression, 69% of the sample reported mild  
155 symptoms, 13.2% reported moderate symptoms and 17.7% reported severe (7.2%) or extremely severe (10.5%) symptoms.  
156 For anxiety, 65% of participants reported no or mild symptoms, 15.5% reported moderate symptoms and 19.5% reported  
157 severe (6.1%) or extremely severe (13.4%) symptoms. This pattern was relatively similar for stress. Most of the sample had  
158 no or mild symptoms (72.3%), 11.4% of them were in the moderate category and 16.4% were in the severe (11.0%) or  
159 extremely severe (5.4%) category. Severe or extremely severe symptoms of depression, anxiety and stress were more likely  
160 to be reported by women, participants attending public universities and those from higher socioeconomic levels. Those who  
161 reported having tried conventional cigarettes or ENDS had more severe or extremely severe symptoms than those who had  
162 never tried them.

163 Table 3 shows the multivariate analysis by ordinal logistic regression of socio-demographic and tobacco/ENDS use variables  
164 associated with depression, anxiety and stress. Depression was more severe in participants who had tried ENDS (OR: 1.35;  
165 95% CI: 1.15-1.59). Higher levels of depression were found in women (OR: 1.39; 95% CI: 1.19-1.62), students from public  
166 universities (OR: 1.53; 95% CI: 1.19-1.98), participants who reported a previous diagnosis of any type of depressive disorder  
167 (OR: 4.80; 95% CI: 3.63-6.34) or any type of anxiety disorder (OR: 2.92; 95% CI: 2.23-3.83). Having members of the nuclear  
168 family (OR: 1.23; 95% CI: 1.05-1.44), family members (OR: 1.35; 95% CI: 1.15-1.57), or close friends (OR: 1.28; 95% CI: 1.09-  
169 1.50) with a history of nicotine use was positively associated with higher levels of depression. Participants with a child (OR:  
170 0.62; 95% CI: 0.49-0.79), who lived in a couple (OR: 0.66; 95% CI: 0.53-0.82), or who reported studying and working at the  
171 same time in the last 6 months (OR: 0.82; 95% CI: 0.70-0.96) or doing physical activity (OR: 0.82; 95% CI: 0.71-0.95) were less  
172 likely to have worse depression.

173 **Table 3. Multivariate analysis of the sociodemographic and use of tobacco/ENDS variables associated with depression,**  
174 **anxiety and stress.**

175

176

177

|                                                            | DEPRESSION <sup>a</sup>         |                      |             |                              |                      |             | ANXIETY <sup>a</sup>            |                      |             |                              |                      |             | STRESS <sup>a</sup>             |                      |            |                              |                      |             |
|------------------------------------------------------------|---------------------------------|----------------------|-------------|------------------------------|----------------------|-------------|---------------------------------|----------------------|-------------|------------------------------|----------------------|-------------|---------------------------------|----------------------|------------|------------------------------|----------------------|-------------|
|                                                            | Multivariate Model <sup>b</sup> |                      |             | Reduced model <sup>c,d</sup> |                      |             | Multivariate Model <sup>e</sup> |                      |             | Reduced model <sup>f,g</sup> |                      |             | Multivariate Model <sup>h</sup> |                      |            | Reduced model <sup>i,j</sup> |                      |             |
|                                                            | OR*                             | [95% Conf. Interval] |             | OR*                          | [95% Conf. Interval] |             | OR*                             | [95% Conf. Interval] |             | OR*                          | [95% Conf. Interval] |             | OR*                             | [95% Conf. Interval] |            | OR*                          | [95% Conf. Interval] |             |
| Having tried ENDS                                          | <b>1,3</b>                      | <b>1,1</b>           | <b>1,6</b>  | <b>1,35</b>                  | <b>1,15</b>          | <b>1,59</b> | <b>1,1</b>                      | <b>0,93</b>          | <b>1,3</b>  | <b>1,2</b>                   | <b>1</b>             | <b>1,4</b>  | <b>1,2</b>                      | <b>1</b>             | <b>1,4</b> | <b>1,47</b>                  | <b>1,25</b>          | <b>1,72</b> |
| Having tried conventional cigarette                        | 1,1                             | 0,9                  | 1,3         |                              |                      |             | 1,1                             | 0,93                 | 1,3         |                              |                      |             | 1,2                             | 1                    | 1,4        |                              |                      |             |
| Women                                                      | <b>1,4</b>                      | <b>1,2</b>           | <b>1,6</b>  | <b>1,39</b>                  | <b>1,19</b>          | <b>1,62</b> | <b>1,6</b>                      | <b>1,4</b>           | <b>1,9</b>  | <b>1,7</b>                   | <b>1,4</b>           | <b>1,9</b>  | <b>1,6</b>                      | <b>1,4</b>           | <b>1,9</b> | <b>1,65</b>                  | <b>1,41</b>          | <b>1,93</b> |
| Public university                                          | <b>1,5</b>                      | <b>1,2</b>           | <b>2</b>    | <b>1,53</b>                  | <b>1,19</b>          | <b>1,98</b> | 1,2                             | 0,86                 | 1,5         | 1,1                          | 0,89                 | 1,5         | <b>1,3</b>                      | <b>1</b>             | <b>1,7</b> | <b>1,32</b>                  | <b>1,01</b>          | <b>1,71</b> |
| <b>Socioeconomic levels</b>                                |                                 |                      |             |                              |                      |             |                                 |                      |             |                              |                      |             |                                 |                      |            |                              |                      |             |
| Low (0-2)                                                  | 1                               |                      |             |                              |                      |             | 1                               |                      |             |                              |                      |             | 1                               |                      |            | 1                            |                      |             |
| Middle (3-4)                                               | 0,99                            | 0,84                 | 1,2         |                              |                      |             | 1                               | 0,89                 | 1,2         |                              |                      |             | 1,1                             | 0,93                 | 1,3        | 1,1                          | 0,93                 | 1,3         |
| High (5-6)                                                 | 0,97                            | 0,74                 | 1,3         |                              |                      |             | 1,1                             | 0,81                 | 1,4         |                              |                      |             | 1,3                             | 0,97                 | 1,7        | 1,3                          | 0,97                 | 1,7         |
| <b>Number of children</b>                                  |                                 |                      |             |                              |                      |             |                                 |                      |             |                              |                      |             |                                 |                      |            |                              |                      |             |
| 1 child                                                    | 0,6                             | 0,47                 | 0,76        | <b>0,62</b>                  | <b>0,49</b>          | <b>0,79</b> | 0,87                            | 0,69                 | 1,1         | <b>0,74</b>                  | <b>0,6</b>           | <b>0,92</b> | <b>0,69</b>                     | <b>0,53</b>          | <b>0,9</b> | 1                            |                      |             |
| 2 children                                                 | 0,39                            | 0,28                 | 0,56        | <b>0,41</b>                  | <b>0,29</b>          | <b>0,57</b> | <b>0,69</b>                     | <b>0,5</b>           | <b>0,95</b> | <b>0,53</b>                  | <b>0,4</b>           | <b>0,71</b> | 0,7                             | 0,49                 | 1          | 0,88                         | 0,62                 | 1,26        |
| 3 or more children                                         | <b>0,37</b>                     | <b>0,21</b>          | <b>0,65</b> | <b>0,37</b>                  | <b>0,21</b>          | <b>0,65</b> | <b>0,78</b>                     | 0,47                 | 1,3         | <b>0,5</b>                   | <b>0,31</b>          | <b>0,79</b> | 0,95                            | 0,56                 | 1,6        | 0,99                         | 0,59                 | 1,66        |
| No children                                                | 1                               |                      |             | 1                            |                      |             | 1                               |                      |             |                              |                      |             | 1                               |                      |            | <b>1,77</b>                  | <b>1,38</b>          | <b>2,26</b> |
| <b>Living with</b>                                         |                                 |                      |             |                              |                      |             |                                 |                      |             |                              |                      |             |                                 |                      |            |                              |                      |             |
| Both parents                                               | 0,93                            | 0,73                 | 1,2         |                              |                      |             | 1,1                             | 0,86                 | 1,4         |                              |                      |             | 0,93                            | 0,73                 | 1,2        |                              |                      |             |
| Mom or dad                                                 | 0,89                            | 0,7                  | 1,1         |                              |                      |             | 1                               | 1                    | 1,3         |                              |                      |             | 0,98                            | 0,76                 | 1,2        |                              |                      |             |
| Other family member                                        | 1,1                             | 0,87                 | 1,3         |                              |                      |             | 1                               | 0,85                 | 1,2         |                              |                      |             | 1,1                             | 0,88                 | 1,3        |                              |                      |             |
| Alone                                                      | 0,94                            | 0,67                 | 1,3         |                              |                      |             | 1                               | 0,75                 | 1,5         |                              |                      |             | 0,88                            | 0,61                 | 1,3        |                              |                      |             |
| Couple                                                     | <b>0,63</b>                     | <b>0,48</b>          | <b>0,83</b> | <b>0,66</b>                  | <b>0,53</b>          | <b>0,82</b> | 0,98                            | 0,76                 | 1,3         | 0,88                         | 0,72                 | 1,1         | 0,84                            | 0,63                 | 1,1        | <b>0,8</b>                   | <b>0,64</b>          | <b>0,99</b> |
| <b>Working and studying for the past 6 months</b>          | <b>0,81</b>                     | <b>0,69</b>          | <b>0,96</b> | <b>0,82</b>                  | <b>0,7</b>           | <b>0,96</b> | 1                               | 0,87                 | 1,2         | 0,94                         | 0,81                 | 1,1         | 1                               | 0,85                 | 1,2        | 0,91                         | 0,78                 | 1,07        |
| <b>Doing physical activity</b>                             | <b>0,82</b>                     | <b>0,71</b>          | <b>0,95</b> | <b>0,82</b>                  | <b>0,71</b>          | <b>0,95</b> | <b>0,81</b>                     | <b>0,7</b>           | <b>0,93</b> | <b>0,81</b>                  | <b>0,7</b>           | <b>0,92</b> | 0,86                            | 0,74                 | 1          | 0,87                         | 0,75                 | 1,01        |
| <b>Previous diagnosis</b>                                  |                                 |                      |             |                              |                      |             |                                 |                      |             |                              |                      |             |                                 |                      |            |                              |                      |             |
| Any type of depressive disorder                            | <b>4,7</b>                      | <b>3,5</b>           | <b>6,2</b>  | <b>4,8</b>                   | <b>3,63</b>          | <b>6,34</b> | <b>2,7</b>                      | <b>2,1</b>           | <b>3,6</b>  | <b>2,7</b>                   | <b>2,1</b>           | <b>3,6</b>  | <b>4,2</b>                      | <b>3,2</b>           | <b>5,4</b> | <b>4,7</b>                   | <b>3,68</b>          | <b>5,99</b> |
| Any type of anxiety disorder                               | <b>3</b>                        | <b>2,3</b>           | <b>4</b>    | <b>2,92</b>                  | <b>2,23</b>          | <b>3,83</b> | <b>4,1</b>                      | <b>3,1</b>           | <b>5,4</b>  | <b>4,3</b>                   | <b>3,3</b>           | <b>5,6</b>  |                                 |                      |            |                              |                      |             |
| <b>Having someone with history of nicotine consumption</b> |                                 |                      |             |                              |                      |             |                                 |                      |             |                              |                      |             |                                 |                      |            |                              |                      |             |
| Members of the nuclear family                              | <b>1,2</b>                      | <b>1</b>             | <b>1,4</b>  | <b>1,23</b>                  | <b>1,05</b>          | <b>1,44</b> | <b>1,2</b>                      | <b>1</b>             | <b>1,4</b>  | <b>1,2</b>                   | <b>1</b>             | <b>1,4</b>  | <b>1,4</b>                      | <b>1,2</b>           | <b>1,6</b> | <b>1,42</b>                  | <b>1,22</b>          | <b>1,67</b> |
| Family members                                             | <b>1,3</b>                      | <b>1,1</b>           | <b>1,5</b>  | <b>1,35</b>                  | <b>1,15</b>          | <b>1,57</b> | 1,2                             | 0,99                 | 1,3         | <b>1,2</b>                   | <b>1</b>             | <b>1,4</b>  | <b>1,2</b>                      | <b>1,1</b>           | <b>1,4</b> | <b>1,34</b>                  | <b>1,15</b>          | <b>1,56</b> |
| Couple                                                     | 1                               | 0,78                 | 1,3         |                              |                      |             | 1,2                             | 0,91                 | 1,5         |                              |                      |             | <b>1,4</b>                      | <b>1,1</b>           | <b>1,8</b> |                              |                      |             |
| Close friends                                              | <b>1,3</b>                      | <b>1,1</b>           | <b>1,5</b>  | <b>1,28</b>                  | <b>1,09</b>          | <b>1,5</b>  | <b>1,3</b>                      | <b>1,1</b>           | <b>1,6</b>  | <b>1,4</b>                   | <b>1,2</b>           | <b>1,6</b>  | 1,1                             | 0,9                  | 1,3        |                              |                      |             |
| Colleagues                                                 | 1,2                             | 0,77                 | 2           |                              |                      |             | 1,4                             | 0,87                 | 2,1         |                              |                      |             | <b>1,6</b>                      | <b>1</b>             | <b>2,5</b> |                              |                      |             |

<sup>a</sup> Bold numbers highlight the significant associated factors with adequate 95% confidence intervals.

178  
179

180 <sup>b</sup> Log-likelihood Intercept only: -3552.357; Log-likelihood Model: -3216.263; AIC: 6486.527; BIC: 6654.659; n=3741  
181 <sup>c</sup> Log-likelihood Intercept only: -3636.903; Log-likelihood Model: -3292.140; AIC: 6618.280; BIC: 6724.483; n=3817  
182 <sup>d</sup> The reduced model was based on the Furnival-Wilson leaps-and-bounds algorithm; Linearity link test p=0.144, Odds Parallel Brant test p=0.773 for Having tried ENDS  
183 <sup>f</sup> Log-likelihood Intercept only: -3776.781; Log-likelihood Model: -3506.099; AIC: 7066.198; BIC: 7234.330; n=3741  
184 <sup>g</sup> Log-likelihood Intercept only: -3855.420; Log-likelihood Model: -3582.828; AIC: 7199.657; BIC: 7305.860; n=3817  
185 <sup>h</sup> The reduced model was based on the Furnival-Wilson leaps-and-bounds algorithm; Linearity link test p=0.086, Odds Parallel Brant test p=0.147 for Having tried ENDS  
186 <sup>i</sup> Log-likelihood Intercept only: -3300.127; Log-likelihood Model: -3078.779; AIC: 6211.557; BIC: 6379.689; n=3741  
187 <sup>j</sup> Log-likelihood Intercept only: -3372.542; Log-likelihood Model: -3167.020; AIC: 6364.039; BIC: 6457.748; n=3817  
188 <sup>k</sup> The reduced model was based on the Furnival-Wilson leaps-and-bounds algorithm; Linearity link test p=0.183, Odds Parallel Brant test p=0.791 for Having tried



189 Anxiety levels were higher in women compared to men (OR: 1.7; 95% CI: 1.4-1.9) and in people who had tried ENDS (OR: 1.2;  
190 95% CI: 1-1.4). Participants with a history of depressive disorders (OR: 2.7; 95% CI: 2.1-3.6), anxiety disorders of any type (OR:  
191 4.3; 95% CI: 3.3-5.6), or those who reported having close relatives (OR: 1.2; 95% CI: 1-1.4), family members (OR: 1.2; 95% CI:  
192 1-1.4), and friends (OR: 1.4; 95% CI: 1.2-1.6) with a history of nicotine use were more likely to have higher levels of anxiety.  
193 On the other hand, people who reported being parents of three or more children (OR: 0.5; 95% CI: 0.31-0.79) and those who  
194 did some kind of physical activity (OR: 0.81; 95% CI: 0.7-0.92) had lower levels of anxiety.  
195 A previous diagnosis of any type of depressive disorder increased the likelihood of having higher levels of stress by 4.7 times  
196 (OR: 4.7; 95% CI: 3.6-5.9). Women (OR: 1.65; 95% CI: 1.4-1.9), people who had tried ENDS in their lifetime (OR: 1.47; 95% CI:  
197 1.25-1.72) and students at public universities (OR: 1.32; 95% CI: 1.0-1.7) had a higher risk of having worse stress levels. This  
198 result is similar for people who had members of the nuclear family (OR: 1.4; 95% CI: 1.2-1.6), as well as for family members  
199 (OR: 1.3; 95% CI: 1.1-1.5) with a history of nicotine consumption, or for people without children (OR: 1.77; 95% CI: 1.3-2.2).  
200 Finally, participants who lived with a couple had fewer stress symptoms (OR: 0.8; 95% CI: 0.6-0.9).

201

## 202 Discussion

203 This study with university students from Bogotá revealed high frequency of symptoms of depression, anxiety and stress in  
204 the population, with higher levels of mental health symptoms in people with a previous diagnose of depression or anxiety.  
205 This finding is similar to those reported in other small studies with participants from different regions of Colombia [48], [49],  
206 [50], [54] but significantly different from the prevalence reported for these age groups in the latest National Mental Health  
207 Survey of Colombia (NMHS, 2015) [55]. According to the NMHS, the prevalence of a depressive disorder in the last 30 days is  
208 0.5% in adults and 1.1% for an anxiety disorder [55].

209 There are several factors that could explain this difference. First, the present study assesses symptoms of depression and  
210 anxiety, whereas the NMHS assesses the prevalence of diagnosed disorders. In addition, the prevalence of mood disorders  
211 among students has increased over the years [56], [57]. The COVID-19 pandemic has also had a strong impact on mental

212 health, not only in students but also in the general population. Fear of the disease, isolation and other health-related  
213 situations experienced in the year 2020 favoured the increase in the prevalence of mental disorders worldwide [58], [59].  
214 The Colombian NMHS describes that affective and anxiety disorders are more common in women [55], which is consistent  
215 with the findings of the present study. Both the NMHS and studies aimed at identifying the association between mental health  
216 and socio-demographic factors [60] have found a relationship with socioeconomic level of individuals. Results suggest that  
217 people with greater socioeconomic vulnerability in their households are more likely to have mental health symptoms. In the  
218 case of this study, no relationship was found between socioeconomic level and mental health symptoms.  
219 However, we did find a relationship between the type of university the participants attended and the presence of stress and  
220 depressive symptoms. We found that students from public institutions were more likely to report more depressive and stress  
221 symptoms than those from private universities. Evidence from schools in the United Kingdom has shown that there is a  
222 difference in the mental health of students when comparing public and private schools, attributing the differences to  
223 contextual factors and to the amount of resources available for the school to invest in the student's wellbeing and educational  
224 processes [61]. Although these data come from research in schools, it is possible that these hypotheses could explain the  
225 difference found in the present study, given that in Colombia public universities tend to have fewer resources and are highly  
226 competitive environments, being much affordable than private institutions. However, it would be important to study this  
227 phenomenon further in university contexts to confirm this hypothesis.  
228 Working and studying at the same time was found to have an association with emotional symptoms. It could be expected  
229 that an increase in the burden of combining academic and work responsibilities would increase distress, however, the findings  
230 of this study showed the opposite. Having studied and worked simultaneously in the last six months showed a decrease in  
231 the likelihood of reporting symptoms of depression, and no significant relationship was found between this variable and  
232 symptoms of stress or anxiety. A possible explanation for this finding is that working and studying is not seen as an additional  
233 burden, but as a source of economic stability, which in turn can reduce negative emotional symptoms.  
234 Similarly, having children could be seen as a possible additional stressor, nevertheless our model suggests that it reduces the  
235 likelihood of reporting symptoms of anxiety and depression. This is consistent with the findings of Lee et al. (2022), who  
236 showed that during the pandemic, adults living with children at home had lower rates of isolation-related distress in terms

237 of depression and anxiety [62]. These authors suggest that this may be due to a greater sense of purpose in parenting, as well  
238 as the development of social relationships with and through children (such as participation in parenting groups), both of  
239 which may contribute to better mental health [62]. The findings of these authors may be a possible explanation to the positive  
240 effect of living with a couple on depression and stress as well.

241 The effect of having smokers in the immediate environment also showed a relationship with the mental health of the  
242 participants. In 2021, Lee and Kim published an article discussing how adolescent exposure to second hand smoke could  
243 increase the risk of mental health problems such as stress, depression, and suicidal ideation [63]. The results of our study  
244 showed that nicotine use by family members, other relatives or close friends increased the likelihood of having more  
245 symptoms of depression and anxiety, and that use by relatives increased the likelihood of having symptoms of stress. This  
246 may be due to both social and biological factors. On the one hand, nicotine consumption is seen as a factor affecting the  
247 ability to lead a healthy lifestyle, which has a significant impact on people's physical and mental health, and nicotine  
248 environments can be stressful for people [64]. Secondly, nicotine exposure has been found to affect the dopaminergic  
249 pathways in the brain, which may ultimately affect people's emotional and behavioural regulation [65]. Opposite to this,  
250 doing physical activity – a key element of a healthy lifestyle - was found to be protective for symptoms of depression and  
251 anxiety. This result has been repetitively found in multiple studies, including some systematic reviews that have shown there  
252 is a relationship between increased physical activity and the reduction of emotional symptoms associated with depression  
253 and anxiety [66]. Specifically, exercise has been found to have a positive impact on mental health due to different factors,  
254 such as a reduction in muscle tension as well as an increase in the production of certain neurochemicals associated with  
255 mood. In addition, focusing attention on physical activity has been shown to help people withdraw their attention from  
256 negative thought cycles that are associated with the presence of symptoms of depression and anxiety [67].

257 Finally, our results showed that having tried ENDS increases the likelihood of experiencing symptoms of depression, anxiety  
258 and stress. Interestingly, we did not find an association between having tried conventional cigarettes and any mental health  
259 symptom. Our findings contribute to other studies that are starting to show a bidirectional association between nicotine use  
260 and mental health symptoms [35], [68]. These findings may be partially explained by the perceived desirable effects of  
261 tobacco use, as many people see it as a strategy to reduce stress and emotional discomfort. However, these effects are due

262 to the immediate physiological response produced by nicotine and other chemicals in the brain that stimulate the brain's  
263 reward system. This brief sensation makes smoking desirable for people with various mental health conditions, as it increases  
264 the feeling of control over discomfort. However, the effect is short-lived and, in the long term, smoking can make symptoms  
265 worse [68], [69]. This can be seen, for example, in people with anxiety or stress. Initially, nicotine produces a feeling of  
266 relaxation and calm that helps to relieve anxiety symptoms, but as this effect wears off, withdrawal symptoms can worsen  
267 the symptoms of anxiety and discomfort [70]. Not only a mental health diagnosis, but also a negative perception of the impact  
268 of the pandemic on mental health has also been associated with a higher likelihood of ENDS use among Colombian university  
269 students [51].

270 In conclusion, our study aimed to investigate the association between the use of electronic nicotine delivery systems (ENDS)  
271 and mental health among university students in Colombia, a topic that has been understudied in the local context. Through  
272 this study, we aimed to shed light on the frequency of depression, anxiety and stress symptoms among university students,  
273 analyse the interplay between socio-demographic variables and mental health conditions, and examine the potential link  
274 between ENDS use and mental well-being. The results of our research provide valuable insights into understanding the  
275 complex relationship between ENDS use and mental health outcomes.

276 This study has implications for public health policy and interventions targeting university students. Future research should  
277 delve deeper into the underlying mechanisms driving the observed associations, allowing for the design of more targeted and  
278 effective interventions. Overall, our findings highlight the importance of addressing mental health issues and nicotine use  
279 together to create healthier and more resilient university environments. Furthermore, further research should focus on the  
280 need for comprehensive tobacco control policies and targeted interventions to mitigate the potential adverse effects on  
281 mental health. The identification of socioeconomic vulnerability as a factor contributing to ENDS use and associated  
282 symptoms highlights the importance of tailored strategies to support vulnerable populations and promote mental well-being.  
283 Among the strengths of this study, we highlight that the study sample included students from different universities, based on  
284 a probabilistic sampling, with the aim of obtaining inferential results and representing the results of the study. In addition,  
285 this is the first study of its kind in Colombia that analyses the relationship between ENDS consumption and mental health  
286 symptoms. Furthermore, as ENDS consumption is a relatively recent phenomenon, the available information on the

287 characteristics of ENDS consumption is limited. This type of study is of great value in generating evidence that provides an  
288 overview of the use of these devices and assists decision-makers in designing public health policies that ensure the well-being  
289 of the general population.

290 Despite its strengths, our study has some limitations. First, due to the cross-sectional design of the study, it is not possible to  
291 establish a causal relationship between the demographic and consumption variables and the presence of symptoms of  
292 depression, anxiety and stress. In this case, we can only show associations between the variables. For this reason, it would  
293 be important to carry out studies with other designs in order to extend the available information on the relationship between  
294 socio-demographic factors, ENDS consumption and mental health symptoms. Secondly, although a probability sample was  
295 constructed with the intention of making the conclusions generalisable, it is important to mention that there was a greater  
296 participation of students from private universities during the process, so there is an overrepresentation of this population. In  
297 addition, the data collected were self-reported, which may affect the reliability of the information, especially when reporting  
298 mental health symptoms associated with social stigma, potentially leading to social desirability bias.

299  
300

## 301 **Acknowledgements**

302 We would like to acknowledge and thank Sandra Liliana Osses R. and Diana Carolina Maldonado V., who were part of our  
303 research team and contributed significantly to the findings of this project.

304

## 305 **References**

306 [1] World Health Organization, "Electronic nicotine and non nicotine delivery systems. A brief," Copenhagen,  
307 2020. [Online]. Available: <http://www.euro.who.int/pubrequest>

- 308 [2] S. E. Adkison *et al.*, “Electronic nicotine delivery systems: International Tobacco Control Four-Country  
309 Survey,” *Am J Prev Med*, vol. 44, no. 3, pp. 207–215, 2013, doi: 10.1016/j.amepre.2012.10.018.
- 310 [3] R. Greenhill, M. Res, L. Dawkins, C. Notley, M. D. Finn, and J. J. D. Turner, “Adolescent Awareness and Use  
311 of Electronic Cigarettes: A Review of Emerging Trends and Findings,” *Journal of Adolescent Health*, vol.  
312 59, pp. 612–619, 2016, doi: 10.1016/j.jadohealth.2016.08.005.
- 313 [4] I. Pericot-Valverde, D. E. Gaalema, J. S. Priest, and S. T. Higgins, “E-cigarette Awareness, Perceived  
314 Harmfulness, and Ever Use among U.S. Adults,” *Prev Med (Baltim)*, vol. 104, p. 92, Nov. 2017, doi:  
315 10.1016/J.YPMED.2017.07.014.
- 316 [5] T. E. Sussan *et al.*, “Electronic cigarette use behaviors and motivations among smokers and non-  
317 smokers,” *BMC Public Health*, 2017, doi: 10.1186/s12889-017-4671-3.
- 318 [6] C. Pisinger and M. Døssing, “A systematic review of health effects of electronic cigarettes,” *Prev Med*  
319 (*Baltim*), vol. 69, pp. 248–260, Dec. 2014, doi: 10.1016/J.YPMED.2014.10.009.
- 320 [7] P. Callahan-Lyon, “Electronic cigarettes: human health effects,” *Tob Control*, vol. 23, no. suppl 2, pp. ii36–  
321 ii40, May 2014, doi: 10.1136/TOBACCOCONTROL-2013-051470.
- 322 [8] S. J. Huang, Y. M. Xu, and A. T. Y. Lau, “Electronic cigarette: A recent update of its toxic effects on  
323 humans,” *J Cell Physiol*, vol. 233, no. 6, pp. 4466–4478, Jun. 2018, doi: 10.1002/JCP.26352.
- 324 [9] H. McRobbie, C. Bullen, J. Hartmann-Boyce, and P. Hajek, “Electronic cigarettes for smoking cessation and  
325 reduction,” *Cochrane Database of Systematic Reviews*, vol. 2014, no. 12, Dec. 2014, doi:  
326 10.1002/14651858.CD010216.PUB2/MEDIA/CDSR/CD010216/REL0002/CD010216/IMAGE\_N/NCD01021  
327 6-CMP-003-02.PNG.
- 328 [10] C. Bullen *et al.*, “Study protocol for a randomised controlled trial of electronic cigarettes versus nicotine  
329 patch for smoking cessation,” *BMC Public Health*, vol. 13, no. 1, pp. 1–8, Mar. 2013, doi: 10.1186/1471-  
330 2458-13-210/FIGURES/1.
- 331 [11] S.-H. Zhu, Y.-L. Zhuang, S. Wong, S. E. Cummins, and G. J. Tedeschi, “E-cigarette use and associated  
332 changes in population smoking cessation: evidence from US current population surveys.” *BMJ: British*  
333 *Medical Journal*. Accessed: May 23, 2023. [Online]. Available: [https://psycnet.apa.org/record/2017-  
334 32745-001](https://psycnet.apa.org/record/2017-32745-001)
- 335 [12] R. El Dib *et al.*, “Electronic nicotine delivery systems and/or electronic non-nicotine delivery systems for  
336 tobacco smoking cessation or reduction: a systematic review and meta-analysis,” *BMJ Open*, vol. 7, no. 2,  
337 Feb. 2017, doi: 10.1136/BMJOPEN-2016-012680.
- 338 [13] S. Soneji *et al.*, “Association Between Initial Use of e-Cigarettes and Subsequent Cigarette Smoking  
339 Among Adolescents and Young Adults,” *JAMA Pediatr*, vol. 171, no. 8, p. 788, Aug. 2017, doi:  
340 10.1001/jamapediatrics.2017.1488.

- 341 [14] L. M. Dutra and S. A. Glantz, "Electronic cigarettes and conventional cigarette use among U.S.  
342 adolescents: a cross-sectional study," *JAMA Pediatr*, vol. 168, no. 7, pp. 610–617, 2014, doi:  
343 10.1001/JAMAPEDIATRICS.2013.5488.
- 344 [15] N. Doran *et al.*, "Does e-cigarette use predict cigarette escalation? A longitudinal study of young adult  
345 non-daily smokers," *Prev Med (Baltim)*, vol. 100, p. 279, Jul. 2017, doi: 10.1016/J.YPMED.2017.03.023.
- 346 [16] T. Flensburg-Madsen Trine, M. Bay von Scholten, E. M. Flachs, E. L. Mortensen, E. Prescott, and J. S.  
347 Tolstrup, "Tobacco smoking as a risk factor for depression. A 26-year population-based follow-up study,"  
348 *J Psychiatr Res*, vol. 45, no. 2, pp. 143–149, 2011, doi: 10.1016/J.JPSYCHIRES.2010.06.006.
- 349 [17] M. Fluharty, A. E. Taylor, M. Grabski, and M. R. Munafò, "The Association of Cigarette Smoking With  
350 Depression and Anxiety: A Systematic Review," *Nicotine Tob Res*, vol. 19, no. 1, pp. 3–13, Jan. 2017, doi:  
351 10.1093/NTR/NTW140.
- 352 [18] J. Gfroerer, S. R. Dube, B. A. King, B. E. Garrett, S. Babb, and T. McAfee, "Vital Signs: Current Cigarette  
353 Smoking Among Adults Aged ≥18 Years with Mental Illness — United States, 2009–2011," *Morbidity and*  
354 *Mortality Weekly Report*, vol. 62, no. 5, p. 81, Feb. 2013, Accessed: May 24, 2023. [Online]. Available:  
355 /pmc/articles/PMC4604817/
- 356 [19] B. T. Hagman, C. D. Delnevo, M. Hrywna, and J. M. Williams, "Tobacco use among those with serious  
357 psychological distress: results from the national survey of drug use and health, 2002," *Addictive*  
358 *behaviors*, vol. 33, no. 4, pp. 582–592, Apr. 2008, doi: 10.1016/J.ADDBEH.2007.11.007.
- 359 [20] J. Drope *et al.*, "Who's still smoking? Disparities in adult cigarette smoking prevalence in the United  
360 States," *CA Cancer J Clin*, vol. 68, no. 2, pp. 106–115, Mar. 2018, doi: 10.3322/CAAC.21444.
- 361 [21] J. Tam, K. E. Warner, and R. Meza, "Smoking and the reduced life expectancy of individuals with serious  
362 mental illness," *Am J Prev Med*, vol. 51, no. 6, pp. 958–966, Dec. 2016, doi:  
363 10.1016/J.AMEPRE.2016.06.007.
- 364 [22] B. Kaplan, J. Thrul, and J. E. Cohen, "Association of cigarette and electronic nicotine delivery systems use  
365 with internalizing and externalizing problems among US adults: Findings from wave 3 (2015-2016) of the  
366 PATH study," *PLoS One*, vol. 16, no. 6, Jun. 2021, doi: 10.1371/JOURNAL.PONE.0253061.
- 367 [23] S. E. Cummins, S. H. Zhu, G. J. Tedeschi, A. C. Gamst, and M. G. Myers, "Use of e-cigarettes by individuals  
368 with mental health conditions," *Tob Control*, vol. 23 Suppl 3, no. Suppl 3, pp. iii48–iii53, Jul. 2014, doi:  
369 10.1136/TOBACCOCONTROL-2013-051511.
- 370 [24] C. A. Spears, D. M. Jones, S. R. Weaver, B. Yang, T. F. Pechacek, and M. P. Eriksen, "Electronic nicotine  
371 delivery system (ENDS) use in relation to mental health conditions, past-month serious psychological  
372 distress and cigarette smoking status, 2017," *Addiction (Abingdon, England)*, vol. 114, no. 2, pp. 315–325,  
373 Feb. 2019, doi: 10.1111/ADD.14464.
- 374 [25] S. H. Park, L. Lee, J. A. Shearston, and M. Weitzman, "Patterns of electronic cigarette use and level of  
375 psychological distress," *PLoS One*, vol. 12, no. 3, Mar. 2017, doi: 10.1371/JOURNAL.PONE.0173625.

- 376 [26] T. Pham, J. V. A. Williams, A. Bhattarai, A. K. Dores, L. J. Isherwood, and S. B. Patten, "Electronic cigarette  
377 use and mental health: A Canadian population-based study," *J Affect Disord*, vol. 260, pp. 646–652, Jan.  
378 2020, doi: 10.1016/J.JAD.2019.09.026.
- 379 [27] B. Wamamili *et al.*, "Cigarette smoking and e-cigarette use among university students in Queensland,  
380 Australia and New Zealand: results of two cross-sectional surveys," *BMJ Open*, vol. 11, no. 2, p. e041705,  
381 Feb. 2021, doi: 10.1136/BMJOPEN-2020-041705.
- 382 [28] J. L. King, B. A. Reboussin, J. Spangler, J. Cornacchione Ross, and E. L. Sutfin, "Tobacco product use and  
383 mental health status among young adults," *Addictive behaviors*, vol. 77, pp. 67–72, Feb. 2018, doi:  
384 10.1016/J.ADDBEH.2017.09.012.
- 385 [29] K. E. Riehm *et al.*, "Mental health problems and initiation of e-cigarette and combustible cigarette use,"  
386 *Pediatrics*, vol. 144, no. 1, p. e20182935, 2019, doi: 10.1542/PEDS.2018-2935.
- 387 [30] M. P. Tavoracci, A. Vasiliu, L. Romo, G. Kotbagi, L. Kern, and J. Ladner, "Patterns of electronic cigarette use  
388 in current and ever users among college students in France: a cross-sectional study," *BMJ Open*, vol. 6,  
389 no. 5, 2016, doi: 10.1136/BMJOPEN-2016-011344.
- 390 [31] M. L. Saddleson *et al.*, "Risky behaviors, e-cigarette use and susceptibility of use among college students,"  
391 *Drug Alcohol Depend*, vol. 149, pp. 25–30, Apr. 2015, doi: 10.1016/J.DRUGALCDEP.2015.01.001.
- 392 [32] J. E. Grant, K. Lust, D. J. Fridberg, A. C. King, and S. R. Chamberlain, "E-cigarette use (vaping) is associated  
393 with illicit drug use, mental health problems, and impulsivity in university students.," *Ann Clin Psychiatry*,  
394 vol. 31, no. 1, pp. 27–35, 2019, Accessed: Sep. 18, 2022. [Online]. Available:  
395 <http://www.ncbi.nlm.nih.gov/pubmed/30699215>
- 396 [33] N. Chadi, G. Li, N. Cerda, and E. R. Weitzman, "Depressive Symptoms and Suicidality in Adolescents Using  
397 e-Cigarettes and Marijuana: A Secondary Data Analysis From the Youth Risk Behavior Survey," *J Addict*  
398 *Med*, vol. 13, no. 5, pp. 362–365, Sep. 2019, doi: 10.1097/ADM.0000000000000506.
- 399 [34] Y. Lee and K. S. Lee, "Association of Depression and Suicidality with Electronic and Conventional Cigarette  
400 Use in South Korean Adolescents," *Subst Use Misuse*, vol. 54, no. 6, pp. 934–943, May 2019, doi:  
401 10.1080/10826084.2018.1552301.
- 402 [35] W. V. Lechner, T. Janssen, C. W. Kahler, J. Audrain-McGovern, and A. M. Leventhal, "Bi-directional  
403 associations of electronic and combustible cigarette use onset patterns with depressive symptoms in  
404 adolescents," *Prev Med (Baltim)*, vol. 96, pp. 73–78, Mar. 2017, doi: 10.1016/J.YPMED.2016.12.034.
- 405 [36] A. F. Moustafa, S. Testa, D. Rodriguez, S. Pianin, and J. Audrain-McGovern, "Adolescent depression  
406 symptoms and e-cigarette progression," *Drug Alcohol Depend*, vol. 228, Nov. 2021, doi:  
407 10.1016/J.DRUGALCDEP.2021.109072.
- 408 [37] O. H. Obisesan *et al.*, "Association Between e-Cigarette Use and Depression in the Behavioral Risk Factor  
409 Surveillance System, 2016-2017," *JAMA Netw Open*, vol. 2, no. 12, Dec. 2019, doi:  
410 10.1001/JAMANETWORKOPEN.2019.16800.



- 411 [38] M. L. Pergadia, J. W. Newcomer, and D. G. Gilbert, "Depression and Nicotine Withdrawal Associations  
412 with Combustible and Electronic Cigarette Use," *Int J Environ Res Public Health*, vol. 17, no. 24, pp. 1–5,  
413 Dec. 2020, doi: 10.3390/IJERPH17249334.
- 414 [39] E. Wiernik *et al.*, "Electronic cigarette use is associated with depressive symptoms among smokers and  
415 former smokers: Cross-sectional and longitudinal findings from the Constances cohort," *Addictive  
416 Behaviors*, vol. 90, pp. 85–91, Mar. 2019, doi: 10.1016/J.ADDBEH.2018.10.021.
- 417 [40] J. D. Buckner *et al.*, "E-cigarettes use prior to smoking combustible cigarettes among dual users: The roles  
418 of social anxiety and E-cigarette outcome expectancies," *Addictive behaviors*, vol. 117, Jun. 2021, doi:  
419 10.1016/J.ADDBEH.2021.106854.
- 420 [41] K. Masaki, R. M. Taketa, M. K. Nakama, C. T. Kawamoto, and P. Pokhrel, "Relationships Between  
421 Depressive Symptoms, Anxiety, Impulsivity and Cigarette and E-cigarette Use Among Young Adults,"  
422 *Hawaii J Health Soc Welf*, vol. 81, no. 3, p. 51, Mar. 2022, Accessed: Jun. 04, 2023. [Online]. Available:  
423 /pmc/articles/PMC8899082/
- 424 [42] J. Y. Kim *et al.*, "Nicotine Dependence and Stress Susceptibility in E-Cigarette Smokers: The Korea  
425 National Health and Nutrition Examination Survey 2013-2017," *Tuberc Respir Dis (Seoul)*, vol. 84, no. 2,  
426 pp. 159–166, Apr. 2021, doi: 10.4046/TRD.2020.0166.
- 427 [43] D. S. Mantey, S. I. Clendennen, A. Sumbe, A. V. Wilkinson, and M. B. Harrell, "Perceived stress and E-  
428 cigarette use during emerging adulthood: A longitudinal examination of initiation, progression, and  
429 continuation," *Prev Med (Baltim)*, vol. 160, Jul. 2022, doi: 10.1016/J.YPMED.2022.107080.
- 430 [44] Oficina de las Naciones Unidas Contra la Droga y el Delito (UNODC), "III Estudio epidemiológico andino  
431 sobre consumo de drogas en la población universitaria, Informe Regional, 2016. (III Andean  
432 epidemiological study on drug use in the university population, Regional Inform, 2016)," Lima, 2017.  
433 Accessed: May 29, 2022. [Online]. Available:  
434 [https://www.unodc.org/documents/peruandecuador/Informes/Otros/Informe\\_Universitario\\_Regional.p  
435 df](https://www.unodc.org/documents/peruandecuador/Informes/Otros/Informe_Universitario_Regional.pdf)
- 436 [45] DANE, "Encuesta Nacional de Consumo de Sustancias Psicoactivas (ENCPSA) 2019 (Colombian National  
437 Survey of psychoactive substances)," Bogotá, Colombia, 2019. Accessed: Mar. 31, 2023. [Online].  
438 Available: [https://www.dane.gov.co/index.php/estadisticas-por-tema/salud/encuesta-nacional-de-  
439 consumo-de-sustancias-psicoactivas-encspa](https://www.dane.gov.co/index.php/estadisticas-por-tema/salud/encuesta-nacional-de-consumo-de-sustancias-psicoactivas-encspa)
- 440 [46] Ministerio de Salud y Protección Social and Universidad del Valle, "Encuesta Nacional de Tabaquismo en  
441 Jóvenes de Colombia 2018 (ENTJ) (National Youth Tobacco Survey)," Cali, 2020. Accessed: Mar. 31, 2023.  
442 [Online]. Available: [https://www.minsalud.gov.co/salud/publica/epidemiologia/Paginas/Estudios-y-  
443 encuestas.aspx](https://www.minsalud.gov.co/salud/publica/epidemiologia/Paginas/Estudios-y-encuestas.aspx)
- 444 [47] V. Castellanos Páez, S. M. Mateus Gómez, I. R. Cáceres Durán, and P. A. Díaz Vargas, "Caracterización de  
445 la depresión en estudiantes universitarios," *Revista Salud, Historia Y Sanidad*, vol. 11, no. 1, pp. 37–50,  
446 Jan. 2016, Accessed: Aug. 21, 2023. [Online]. Available:  
447 <https://agenf.org/ojs/index.php/shs/article/view/200>

- 448 [48] L. P. Montoya Vélez, J. A. Gutiérrez, B. E. Toro Isaza, M. A. Briñón Zapata, E. Rosas Restrepo, and L. E.  
449 Salazar Quintero, "Depresión en estudiantes universitarios y su asociación con el estrés académico," *CES*  
450 *med*, pp. 7–17, 2010, Accessed: Jun. 04, 2023. [Online]. Available:  
451 <http://revistas.ces.edu.co/index.php/medicina/article/view/1011/735>
- 452 [49] S. Vinaccia Alpi and A. Ortega Bechara, "Variables asociadas a la ansiedad-depresión en estudiantes  
453 universitarios," *Universitas Psychologica*, vol. 19, pp. 1–13, 2020, doi:  
454 10.11144/JAVERIANA.UPSY19.VAAD.
- 455 [50] J. A. Cardona-Arias, D. Pérez-Restrepo, S. Rivera-Ocampo, J. Gómez-Martínez, and Á. Reyes, "Prevalencia  
456 de ansiedad en estudiantes universitarios," *Diversitas: Perspectivas en Psicología 2015*, vol. 11, no. 1, pp.  
457 79–89, 2015, Accessed: Jun. 04, 2023. [Online]. Available:  
458 <http://www.redalyc.org/articulo.oa?id=67943296005>
- 459 [51] D. C. Maldonado Viasús *et al.*, "ENDS consumption in students of higher education: Phenomenon on the  
460 rise during the COVID-19 pandemic," *Tob Induc Dis*, vol. 20, no. November, pp. 1–11, Nov. 2022, doi:  
461 10.18332/TID/154970.
- 462 [52] P. A. Harris *et al.*, "The REDCap consortium: Building an international community of software platform  
463 partners," *J Biomed Inform*, vol. 95, p. 103208, Jul. 2019, doi: 10.1016/j.jbi.2019.103208.
- 464 [53] F. J. Ruiz, M. B. García Martín, J. C. Suárez Falcón, and P. Odriozola González, "The hierarchical factor  
465 structure of the Spanish version of Depression Anxiety and Stress Scale -21.," *International Journal of*  
466 *Psychology & Psychological Therapy*, vol. 17, pp. 97–105, 2017.
- 467 [54] V. Castellanos Páez, S. M. Mateus Gómez, I. R. Cáceres Durán, and P. A. Díaz Vargas, "CARACTERIZACIÓN  
468 DE LA DEPRESIÓN EN ESTUDIANTES UNIVERSITARIOS," *Revista Salud, Historia y Sanidad*, vol. 11, no. 1,  
469 pp. 37–50, Aug. 2016, doi: 10.5281/ZENODO.
- 470 [55] Ministerio de Salud y Protección Social, Universidad Javeriana, and Colciencias, *Encuesta Nacional de*  
471 *Salud Mental 2015*. Bogotá: Ministerio de Salud y Protección Social, 2016. Accessed: Dec. 04, 2022.  
472 [Online]. Available: [https://www.minjusticia.gov.co/programas-](https://www.minjusticia.gov.co/programas-co/ODC/Publicaciones/Publicaciones/CO031102015-salud_mental_tomol.pdf)  
473 [co/ODC/Publicaciones/Publicaciones/CO031102015-salud\\_mental\\_tomol.pdf](https://www.minjusticia.gov.co/programas-co/ODC/Publicaciones/Publicaciones/CO031102015-salud_mental_tomol.pdf)
- 474 [56] C. Álamo, Z. Antúnez, T. Baader, J. Kendall, M. Barrientos, and D. de la Barra, "The sustained increase of  
475 mental health symptoms in Chilean university students over three years," *Rev Latinoam Psicol*, vol. 52,  
476 no. 1, pp. 71–80, 2020, doi: 10.14349/RLP.2020.V52.8.
- 477 [57] A. K. Ibrahim, S. J. Kelly, C. E. Adams, and C. Glazebrook, "A systematic review of studies of depression  
478 prevalence in university students," *J Psychiatr Res*, vol. 47, no. 3, pp. 391–400, 2013, doi:  
479 10.1016/J.JPSYCHIRES.2012.11.015.
- 480 [58] S. Nochaiwong *et al.*, "Global prevalence of mental health issues among the general population during  
481 the coronavirus disease-2019 pandemic: a systematic review and meta-analysis," *Sci Rep*, vol. 11, no. 1,  
482 Dec. 2021, doi: 10.1038/S41598-021-89700-8.

- 483 [59] M. Escobar Lux, M. Mayorga Merino, A. Viviescas, and J. M. Escobar, "The other pandemic: Mental illness  
484 in young people from low and middle-income countries," *Curr Opin Psychol*, vol. 52, p. 101642, Aug.  
485 2023, doi: 10.1016/J.COPSYC.2023.101642.
- 486 [60] Y. Jin *et al.*, "Prevalence and Socio-Demographic Correlates of Poor Mental Health Among Older Adults in  
487 Agricultural Areas of China," *Front Psychiatry*, vol. 11, p. 1076, Nov. 2020, doi:  
488 10.3389/FPSYT.2020.549148/BIBTEX.
- 489 [61] M. Henderson, J. Anders, F. Green, and G. Henseke, "Does attending an English private school benefit  
490 mental health and life satisfaction? From adolescence to adulthood,"  
491 <https://doi.org/10.1080/0305764X.2022.2040951>, vol. 52, no. 5, pp. 539–553, 2022, doi:  
492 10.1080/0305764X.2022.2040951.
- 493 [62] S. J. Lee, K. P. Ward, A. Grogan-Kaylor, and V. Singh, "Anxiety and Depression During COVID-19: Are  
494 Adults in Households with Children Faring Worse?," *J Gen Intern Med*, vol. 37, no. 5, pp. 1328–1330, Apr.  
495 2022, doi: 10.1007/S11606-021-07256-9/FIGURES/2.
- 496 [63] E. Lee and K. Y. Kim, "The Association between Secondhand Smoke and Stress, Depression, and Suicidal  
497 Ideation in Adolescents," *Healthcare*, vol. 9, no. 1, 2021, doi: 10.3390/HEALTHCARE9010039.
- 498 [64] R. Wang *et al.*, "Association between passive smoking and mental distress in adult never-smokers: a  
499 cross-sectional study," *BMJ Open*, vol. 6, no. 7, Jul. 2016, doi: 10.1136/BMJOPEN-2016-011671.
- 500 [65] H. Wang, F. Li, Y. Zhang, F. Jiang, and J. Zhang, "The association between exposure to secondhand smoke  
501 and psychological symptoms among Chinese children," *BMC Public Health*, vol. 19, no. 1, pp. 1–7, Jul.  
502 2019, doi: 10.1186/S12889-019-7006-8/TABLES/4.
- 503 [66] A. Ströhle, "Physical activity, exercise, depression and anxiety disorders," *J Neural Transm*, vol. 116, no. 6,  
504 pp. 777–784, Jun. 2009, doi: 10.1007/s00702-008-0092-x.
- 505 [67] C. Sher and C. Wu, "Physical activity and mental health: Comparing between-person and within-person  
506 associations in longitudinal analysis," *Ment Health Phys Act*, vol. 25, p. 100546, Oct. 2023, doi:  
507 10.1016/j.mhpa.2023.100546.
- 508 [68] World Health Organization, "The vicious cycle of tobacco use and mental illness – a double burden on  
509 health." Accessed: Jul. 04, 2023. [Online]. Available: [https://www.who.int/europe/news/item/08-11-  
510 2021-the-vicious-cycle-of-tobacco-use-and-mental-illness-a-double-burden-on-health](https://www.who.int/europe/news/item/08-11-2021-the-vicious-cycle-of-tobacco-use-and-mental-illness-a-double-burden-on-health)
- 511 [69] National Institute on Drug Abuse, "Is nicotine addictive? | National Institute on Drug Abuse (NIDA)."  
512 Accessed: Jul. 04, 2023. [Online]. Available: [https://nida.nih.gov/publications/research-reports/tobacco-  
513 nicotine-e-cigarettes/nicotine-addictive](https://nida.nih.gov/publications/research-reports/tobacco-nicotine-e-cigarettes/nicotine-addictive)
- 514 [70] Australian and New Zealand Mental Health Association, "Emotional Effects of Smoking." Accessed: Jul.  
515 04, 2023. [Online]. Available: <https://anzmh.asn.au/blog/addiction/emotional-effects-of-smoking>

516

517 **Targeted journal:** PLOS Global public health

518 **Submission guidelines:** <https://journals.plos.org/globalpublichealth/s/submission-guidelines>

519
